# Supplementary material for: Discovering the fish fauna of a lagoon from the southeast of the Yucatan Peninsula, Mexico, using DNA barcodes
Source: PeerJ. 2023 Nov 2;11:e16285. doi: 10.7717/peerj.16285 (PMC10625761; doi:10.7717/peerj.16285)
Supplement: Supplemental Information 2 [file peerj-11-16285-s002.xlsx]

## Sheet: Data larvae
Gear	Date	Morpho	Family	Stage	Num of specimens
Lt Limnetic 1	2022-02-01	1	Clupeidae		33
Lt Limnetic 1	2022-02-01	3	Gobiidae		10
Lt Limnetic 1	2022-02-01	5	Belonidae		4
Lt Limnetic 1	2022-02-01	7	Hemiramphidae		1
Lt Limnetic 1	2022-02-01	Damaged	Damaged		5
Lt Limnetic 2	2022-02-01	Damaged	Damaged		16
Lt Limnetic 3	2022-02-01	1	Clupeidae		104
Lt Limnetic 3	2022-02-01	9	Clupeidae	Preflexion	60
Lt Limnetic 3	2022-02-01	4	Gobiidae	Flexion	14
Lt Limnetic 3	2022-02-01	3	Gobiidae	Preflexion	4
Lt Limnetic 3	2022-02-01	4.1	Gobiidae		22
Lt Littoral 1	2022-02-01	8	C. artifrons	Postflexion	8
Lt Littoral 1	2022-02-01	10	Cyprinodontidae	Postflexion	6
Lt Littoral 1	2022-02-01	11	Cyprinodontidae	Postflexion	3
Lt Littoral 2	2022-02-01	8	C. artifrons	Postflexion	1
Lt Littoral 2	2022-02-01	10	Cyprinodontidae	Postflexion	2
Lt Littoral 3	2022-02-01	8	C. artifrons	Postflexion	7
Lt Littoral 3	2022-02-01	11	Cyprinodontidae	Postflexion	33
Trawl 1	2022-01-31	1	Clupeidae	Flexion	11
Trawl 1	2022-01-31	9	Clupeidae	Preflexion	20
Trawl 1	2022-01-31	2	Gobiidae	Postflexion	4
Trawl 1	2022-01-31	4.1	Gobiidae	Postflexion	48
Trawl 1	2022-01-31	4.1	Gobiidae	Flexion	22
Trawl 1	2022-01-31	4	Gobiidae	Flexion	27
Trawl 1	2022-01-31	4	Gobiidae	Preflexion	14
Trawl 1	2022-01-31	10	Cyprinodontidae	Postflexion	6
Trawl 2	2022-01-31	4	Gobiidae	Postflexion	22
Trawl 2	2022-01-31	4.1	Gobiidae	Flexion	40
Trawl 2	2022-01-31	9	Clupeidae	Preflexion	28
Trawl 2	2022-01-31	11	Cyprinodontidae	Postflexion	33
Trawl 3	2022-01-31	2	Gobiidae	Postflexion	2
Trawl 3	2022-01-31	9	Clupeidae	Preflexion	23
Trawl 3	2022-01-31	1	Clupeidae	Flexion	4
Trawl 3	2022-01-31	4.1	Gobiidae	Flexion	6
Trawl 3	2022-01-31	4	Gobiidae	Flexion	14
Trawl 3	2022-01-31	10	Cyprinodontidae	Postflexion	8
Trawl 3	2022-01-31	Damaged	Damaged		5
Lt Limnetic 1	2022-03-02	5	Belonidae	Flexion	2
Lt Limnetic 1	2022-03-02	3	Gobiidae	Preflexion	4
Lt Limnetic 1	2022-03-02	11	Cyprinodontidae	Postflexion	3
	2022-03-02	Damaged	Damaged		8
Lt Limnetic 2	2022-03-02	1	Clupeidae	Postflexion	27
Lt Limnetic 2	2022-03-02	1	Clupeidae	Flexion	15
Lt Limnetic 3	2022-03-02	1	Clupeidae	Postflexion	64
Lt Limnetic 3	2022-03-02	1	Clupeidae	Flexion	9
Lt Limnetic 3	2022-03-02	9	Clupeidae	Preflexion	20
Lt Limnetic 3	2022-03-02	4	Gobiidae	Flexion	11
Lt Limnetic 3	2022-03-02	3	Gobiidae	Preflexion	17
	2022-03-02	Damaged	Damaged		10
Lt Littoral 1	2022-03-02	8	C. artifrons	Postflexion	4
Lt Littoral 2	2022-03-02	1	Clupeidae	Postflexion	1
Lt Littoral 2	2022-03-02	3	Gobiidae	Preflexion	4
Lt Littoral 2	2022-03-02	13	Cichlidae	Postflexion	1
Lt Littoral 2	2022-03-02	8	C. artifrons	Postflexion	4
Lt Littoral 2	2022-03-02	10	Cyprinodontidae	Postflexion	22
Trawl 1	2022-03-01	1	Clupeidae	Postflexion	1
Trawl 1	2022-03-01	4	Gobiidae	Flexion	4
Trawl 1	2022-03-01	4.1	Gobiidae	Flexion	2
Trawl 1	2022-03-01	9	Clupeidae	Preflexion	3
Trawl 1	2022-03-01	1	Clupeidae	Flexion	2
Trawl 1	2022-03-01	3	Gobiidae	Preflexion	33
Trawl 1	2022-03-01	7	Hemiramphidae	Flexion	1
Trawl 1	2022-03-01	5	Hemiramphidae	Flexion	2
Trawl 1	2022-03-01	10	Cyprinodontidae	Postflexion	14
Trawl 2	2022-03-01	4	Gobiidae	Flexion	25
Trawl 2	2022-03-01	4.1	Gobiidae	Flexion	15
Trawl 2	2022-03-01	9	Clupeidae	Preflexion	18
Trawl 2	2022-03-01	1	Clupeidae	Flexion	50
Trawl 2	2022-03-01	3	Gobiidae	Preflexion	64
Trawl 2	2022-03-01	10	Cyprinodontidae	Postflexion	8
Trawl 2	2022-03-01	2	Gobiidae	Postflexion	1
Trawl 2	2022-03-01	5	Hemiramphidae	Flexion	2
Trawl 3	2022-03-01	1	Clupeidae	Flexion	14
Trawl 3	2022-03-01	4	Gobiidae	Flexion	12
Trawl 3	2022-03-01	4.1	Gobiidae	Postflexion	2
Trawl 3	2022-03-01	9	Clupeidae	Preflexion	26
Trawl 3	2022-03-01	3	Gobiidae	Flexion	13
Trawl 3	2022-03-01	3	Gobiidae	Preflexion	52
Trawl 3	2022-03-01	10	Cyprinodontidae	Postflexion	2
Lt Limnetic 1	2022-04-02	7	Hemiramphidae	Postflexion	1
Lt Limnetic 1	2022-04-02	1	Clupeidae	Postflexion	58
Lt Limnetic 2	2022-04-02	1	Clupeidae	Postflexion	43
Lt Limnetic 2	2022-04-02	9	Clupeidae	Preflexion	7
Lt Limnetic 2	2022-04-02	9	Clupeidae	Flexion	12
Lt Limnetic 2	2022-04-02	4.1	Gobiidae	Postflexion	12
Lt Limnetic 3	2022-04-02	4	Gobiidae	Postflexion	22
Lt Limnetic 3	2022-04-02	4.1	Gobiidae	Postflexion	14
Lt Limnetic 3	2022-04-02	1	Clupeidae	Postflexion	18
Lt Limnetic 3	2022-04-02	9	Clupeidae	Preflexion	12
Lt Limnetic 3	2022-04-02	3	Gobiidae	Flexion	2
Lt Limnetic 3	2022-04-02	Damaged	Damaged		17
Lt Littoral 1	2022-04-02	11	Cyprinodontidae	Postflexion	1
Lt Littoral 1	2022-04-02	10	Cyprinodontidae	Postflexion	1
Lt Littoral 2	2022-04-02	2	Gobiidae	Postflexion	1
Lt Littoral 2	2022-04-02	12	Gobiidae	Postflexion	1
Lt Littoral 2	2022-04-02	13	Cichlidae	Postflexion	2
Lt Littoral 2	2022-04-02	8	C. artifrons	Postflexion	2
Lt Littoral 3	2022-04-02	14	Engraulidae	Postflexion	1
Lt Littoral 3	2022-04-02	10	Cyprinodontidae	Postflexion	10
Trawl 1	2022-04-01	5	Belonidae	Postflexion	1
Trawl 1	2022-04-01	7	Hemiramphidae	Postflexion	1
Trawl 1	2022-04-01	1	Clupeidae	Postflexion	2
Trawl 1	2022-04-01	4	Gobiidae	Flexion	4
Trawl 1	2022-04-01	4	Gobiidae	Flexion	7
Trawl 1	2022-04-01	4.1	Gobiidae	Postflexion	1
Trawl 1	2022-04-01	3	Gobiidae	Preflexion	72
Trawl 1	2022-04-01	11	Cyprinodontidae	Postflexion	17
Trawl 2	2022-04-01	9	Clupeidae	Flexion	4
Trawl 2	2022-04-01	9	Clupeidae	Preflexion	37
Trawl 2	2022-04-01	1	Clupeidae	Flexion	12
Trawl 2	2022-04-01	1	Clupeidae	Postflexion	6
Trawl 2	2022-04-01	4	Gobiidae	Flexion	22
Trawl 2	2022-04-01	4.1	Gobiidae	Postflexion	18
Trawl 2	2022-04-01	4.1	Gobiidae	Flexion	19
Trawl 2	2022-04-01	3	Gobiidae	Preflexion	41
Trawl 2	2022-04-01	10	Cyprinodontidae	Postflexion	8
Trawl 3	2022-04-01	1	Clupeidae	Flexion	59
Trawl 3	2022-04-01	1	Clupeidae	Postflexion	3
Trawl 3	2022-04-01	9	Clupeidae	Preflexion	32
Trawl 3	2022-04-01	12	Gobiidae	Postflexion	1
Trawl 3	2022-04-01	4.1	Gobiidae	Postflexion	9
Trawl 3	2022-04-01	3	Gobiidae	Flexion	13
Trawl 3	2022-04-01	3	Gobiidae	Preflexion	12
Lt Limnetic 1	2022-05-02	15	Gobiidae	Postflexion	2
Lt Limnetic 1	2022-05-02	4.1	Gobiidae	Flexion	5
Lt Limnetic 1	2022-05-02	1	Clupeidae	Flexion	16
Lt Limnetic 1	2022-05-02	1	Clupeidae	Postflexion	1
Lt Limnetic 1	2022-05-02	9	Clupeidae	Preflexion	4
Lt Limnetic 1	2022-05-02	3	Gobiidae	Preflexion	27
Lt Limnetic 2	2022-05-02	1	Clupeidae	Flexion	12
Lt Limnetic 2	2022-05-02	4	Gobiidae	Flexion	5
Lt Limnetic 2	2022-05-02	3	Gobiidae	Preflexion	16
Lt Limnetic 3	2022-05-02	1	Clupeidae	Postflexion	12
Lt Limnetic 3	2022-05-02	1	Clupeidae	Flexion	10
Lt Limnetic 3	2022-05-02	4	Gobiidae	Flexion	10
Lt Limnetic 3	2022-05-02	4.1	Gobiidae	Postflexion	2
Lt Limnetic 3	2022-05-02	3	Gobiidae	Preflexion	4
Lt Limnetic 3	2022-05-02	9	Clupeidae	Preflexion	48
Lt Littoral 1	2022-05-02	8	C. artifrons	Postflexion	5
Lt Littoral 1	2022-05-02	16	F. polyommus	Postflexion	1
Lt Littoral 2	2022-05-02	3	Gobiidae	Preflexion	2
Lt Littoral 3	2022-05-02	11	Cyprinodontidae	Postflexion	46
Lt Littoral 3	2022-05-02	10	Cyprinodontidae	Postflexion	35
Lt Littoral 3	2022-05-02	8	C. artifrons	Postflexion	2
Lt Littoral 3	2022-05-02	16	F. polyommus	Postflexion	1
Lt Littoral 3	2022-05-02	17	G. pulchra	Postflexion	1
Lt Littoral 3	2022-05-02	15	Gobiidae	Postflexion	1
Lt Littoral 3	2022-05-02	18	Clupeidae	Preflexion	21
Lt Littoral 3	2022-05-02	3	Gobiidae	Preflexion	456
Trawl 1	2022-05-01	8	C. artifrons	Postflexion	1
Trawl 1	2022-05-01	1	Clupeidae	Flexion	5
Trawl 1	2022-05-01	4	Gobiidae	Flexion	4
Trawl 1	2022-05-01	3	Gobiidae	Preflexion	73
Trawl 2	2022-05-01	4	Gobiidae	Flexion	18
Trawl 2	2022-05-01	1	Clupeidae	Flexion	7
Trawl 2	2022-05-01	9	Clupeidae	Preflexion	8
Trawl 2	2022-05-01	10	Cyprinodontidae	Postflexion	2
Trawl 2	2022-05-01	5	Hemiramphidae	Preflexion	1
Trawl 2	2022-05-01	3	Gobiidae	Preflexion	70
Trawl 3	2022-05-01	1	Clupeidae	Flexion	88
Trawl 3	2022-05-01	9	Clupeidae	Preflexion	60
Trawl 3	2022-05-01	4	Gobiidae	Flexion	9
Trawl 3	2022-05-01	4.1	Gobiidae	Flexion	5
Trawl 3	2022-05-01	3	Gobiidae	Preflexion	28
Lt Limnetic 3	2022-05-31	1	Clupeidae	Flexion	12
Lt Limnetic 3	2022-05-31	9	Clupeidae	Preflexion	22
Lt Limnetic 3	2022-05-31	4	Gobiidae	Flexion	187
Lt Limnetic 3	2022-05-31	4.1	Gobiidae	Flexion	27
Lt Limnetic 3	2022-05-31	4.1	Gobiidae	Postflexion	13
Lt Limnetic 3	2022-05-31	3	Gobiidae	Preflexion	34
Lt Limnetic 3	2022-05-31	Damaged	Damaged		10
Lt Limnetic 1	2022-05-31	1	Clupeidae	Flexion	14
Lt Limnetic 1	2022-05-31	1	Clupeidae	Postflexion	1
Lt Limnetic 1	2022-05-31	15	Gobiidae	Postflexion	9
Lt Limnetic 1	2022-05-31	4	Gobiidae	Flexion	6
Lt Limnetic 1	2022-05-31	4.1	Gobiidae	Flexion	5
Lt Limnetic 1	2022-05-31	11	Cyprinodontidae	Postflexion	2
Lt Limnetic 1	2022-05-31	14	Anchovia clupeoides	Postflexion	2
Lt Limnetic 2	2022-05-31	1	Clupeidae	Flexion	2
Lt Limnetic 2	2022-05-31	9	Clupeidae	Preflexion	2
Lt Limnetic 2	2022-05-31	4.1	Gobiidae	Flexion	1
Lt Limnetic 2	2022-05-31	11	Cyprinodontidae	Postflexion	1
Lt Limnetic 2	2022-05-31	3	Gobiidae	Preflexion	4
Lt Limnetic 2	2022-05-31	3	Gobiidae	Flexion	12
Lt Littoral 3	2022-05-31	15	Gobiidae	Postflexion	1
Lt Littoral 3	2022-05-31	8	Cyprinodontidae	Postflexion	6
Lt Littoral 3	2022-05-31	11	Cyprinodontidae	Postflexion	10
Lt Littoral 3	2022-05-31	16	Cyprinodontidae	Postflexion	4
Lt Littoral 3	2022-05-31	13	Cichlidae	Flexion	4
Lt Littoral 1	2022-05-31	8	C. artifrons	Juvenil	11
Lt Littoral 1	2022-05-31	16	F. polyommus	Postflexion	1
Lt Littoral 1	2022-05-31	17	G. pulchra	Postflexion	1
Lt Littoral 1	2022-05-31	4	Gobiidae	Flexion	1
Lt Littoral 1	2022-05-31	10	Gobiidae	Postflexion	2
Lt Littoral 2	2022-05-31	8	Cyprinodontidae	Juvenil	1
Lt Littoral 2	2022-05-31	13	Cichlidae	Flexion	1
Lt Littoral 2	2022-05-31	4	Gobiidae	Postflexion	1
Trawl 3	2022-05-30	1	Clupeidae	Flexion	12
Trawl 3	2022-05-30	9	Clupeidae	Preflexion	30
Trawl 3	2022-05-30	4	Gobiidae	Flexion	33
Trawl 3	2022-05-30	4.1	Gobiidae	Flexion	14
Trawl 3	2022-05-30	3	Gobiidae	Flexion	12
Trawl 3	2022-05-30	3	Gobiidae	Preflexion	32
Trawl 3	2022-05-30	10	Cyprinodontidae	Postflexion	5
Trawl 3	2022-05-30	2	Gobiidae	Postflexion	1
Trawl 3	2022-05-30	7	Hemiramphidae	Flexion	1
Trawl 2	2022-05-30	1	Clupeidae	Flexion	8
Trawl 2	2022-05-30	9	Clupeidae	Preflexion	27
Trawl 2	2022-05-30	4	Gobiidae	Flexion	33
Trawl 2	2022-05-30	4.1	Gobiidae	Flexion	11
Trawl 2	2022-05-30	3	Gobiidae	Flexion	4
Trawl 2	2022-05-30	3	Gobiidae	Preflexion	30
Trawl 2	2022-05-30	10	Cyprinodontidae	Postflexion	3
Trawl 2	2022-05-30	2	Gobiidae	Postflexion	5
Trawl 2	2022-05-30	5	Hemiramphidae	Flexion	1
Trawl 1	2022-05-30	4	Gobiidae	Flexion	6
Trawl 1	2022-05-30	3	Gobiidae	Preflexion	8
Trawl 1	2022-05-30	10	Cyprinodontidae	Postflexion	10
Trawl 1	2022-05-30	7	Hemiramphidae	Juvenil	2
				SUM	3722

## Sheet: Weight Ichthyoplacton
Base and filter
3.78	Average	Standar dev
3.784	3.78025	0.00287228
3.78		0.00287228
3.777
overall weight	Biomass		Average	Standar dev		overall weight	Biomass		Average	Standar dev		overall weight	Biomass		Average	Standar dev		overall weight	Biomass		Average	Standar dev		overall weight	Biomass		Average	Standar dev
01/February/22 Lt Limnetic 1						02/March/22 Lt Limnetic 1						02/April/22 Lt Limnetic 1						02/May/22 Lt Limnetic 1						31/May/22 Lt Limnetic 1
4.418	0.63775					3.778	-0.00225					4.966	1.18575					4.667	0.88675					6.409	2.62875
4.435	0.65475		0.64875	0.00953939		3.794	0.01375		0.0104167	0.0113725		4.962	1.18175		1.18475	0.00264575		4.641	0.86075		0.877083	0.0142244		6.4	2.61975		2.62942	0.0100167
4.434	0.65375			0.00953939		3.8	0.01975			0.0113725		4.967	1.18675			0.00264575		4.664	0.88375			0.0142244		6.42	2.63975
01/February/22 Lt Limnetic 2						02/March/22 Lt Limnetic 2						02/April/22 Lt Limnetic 2						02/May/22 Lt Limnetic 2						31/May/22 Lt Limnetic 2
3.84	0.05975					4.446	0.66575					4.263	0.48275					3.845	0.06475					3.856	0.07575
3.836	0.05575		0.0510833	0.0117189		4.42	0.63975		0.652083	0.0130512		4.253	0.47275		0.475417	0.0064291		3.867	0.08675		0.06975	0.0151327		3.9		0.11975	0.06275	0.0191572
3.818	0.03775			0.0117189		4.431	0.65075			0.0130512		4.251	0.47075			0.0064291		3.838	0.05775			0.0151327		3.821	0.04075
																								3.852	0.07175
01/February/22 Lt Limnetic 3						02/March/22 Lt Limnetic 3						02/April/22 Lt Limnetic 3						02/May/22 Lt Limnetic 3						31/May/22 Lt Limnetic 3
4.523	0.74275					5.399	1.61875					3.981	0.20075					4.192	0.41175					4.36	0.57975
4.504	0.72375		0.733417	0.00950438		5.39	1.60975		1.6275	0.015756		3.994	0.21375		0.203417	0.00929157		4.185	0.40475		0.407083	0.00404145		4.382	0.60175		0.59775	0.0163707
4.514	0.73375			0.00950438		5.422	1.64175			0.015756		3.976	0.19575			0.00929157		4.185	0.40475			0.00404145		4.342
						5.42	1.63975																	4.392	0.61175
01/February/22 Lt Littoral 1						02/March/22 Lt Littoral 1						02/April/22 Lt Littoral 1						02/May/22 Lt Littoral 1						31/May/22 Lt Littoral 1
4.293	0.51275					3.869	0.08875					3.793	0.01275					4.539	0.75875
4.278	0.49775		0.507083	0.00814453		3.856	0.07575		0.0824167	0.00650641		3.781	0.00075		0.00808333	0.0064291		4.546	0.76575		0.759083	0.00650641		6.94	3.15975		3.17408	0.0183394
4.291	0.51075			0.00814453		3.863	0.08275			0.00650641		3.791	0.01075			0.0064291		4.533	0.75275			0.00650641		6.975	3.19475
																								6.948	3.16775
01/February/22 Lt Littoral 2						02/March/22 Lt Littoral 2						02/April/22 Lt Littoral 2						02/May/22 Lt Littoral 2						31/May/22 Lt Littoral 2
3.808	0.02775					3.988	0.20775					3.909	0.12875					3.782	0.00175					3.817	0.03675
3.811	0.03075		0.0250833	0.00737111		3.989	0.20875		0.204083	0.00723418		3.915	0.13475		0.13275	0.0034641		3.777	-0.00325		0.00208333	0.00550757		3.848	0.06775		0.0470833	0.0178979
3.797	0.01675			0.00737111		3.976	0.19575			0.00723418		3.915	0.13475			0.0034641		3.788	0.00775			0.00550757		3.817	0.03675
01/February/22 Lt Littoral 3						02/March/22 Lt Littoral 3						02/April/22 Lt Littoral 3						02/May/22 Lt Littoral 3						31/May/22 Lt Littoral 3
3.887	0.10675											3.803	0.02275					4.011	0.23075					4.068	0.28775
3.88	0.09975		0.102417	0.00378594		This sample was eaten by a cocodrile						3.801	0.02075		0.0220833	0.0011547		4.013	0.23275		0.227083	0.00814453		4.09	0.30975		0.31275	0.0185652
3.881	0.10075			0.00378594								3.803	0.02275			0.0011547		3.998	0.21775			0.00814453		4.109	0.32875
																								4.105	0.32475
31/January/22 Trawl 1 Night						01/March/22 Trawl 1						01/April/22 Trawl 1						01/May/22 Trawl 1						30/May/22 Trawl 1
4.045	0.26475					3.972	0.19175					3.894	0.11375					3.913	0.13275					4.605	0.82475
4.066	0.28575		0.26875	0.0153948		3.974	0.19375		0.196083	0.00585947		3.877	0.09675		0.104417	0.00862168		3.9	0.11975		0.122417	0.00929157		4.53			0.80375	0.0181934
4.036	0.25575			0.0153948		3.983	0.20275			0.00585947		3.883	0.10275			0.00862168		3.895	0.11475			0.00929157		4.574	0.79375
																								4.573	0.79275
31/January/22 Trawl 2						01/March/22 Trawl 2						01/April/22 Trawl 2						01/May/22 Trawl 2						30/May/22 Trawl 2
3.93	0.14975					3.934	0.15375					4.052	0.27175					3.87	0.08975					3.968
3.925	0.14475		0.149083	0.00404145		3.964	0.18375		0.17375	0.0173205		4.034	0.25375		0.25775	0.01249		3.87	0.08975		0.08475	0.00866025		3.893	0.11275		0.130083	0.0161658
3.933	0.15275			0.00404145		3.964	0.18375			0.0173205		4.028	0.24775			0.01249		3.855	0.07475			0.00866025		3.913	0.13275
																								3.925	0.14475
31/January/22 Trawl 3						01/March/22 Trawl 3						01/April/22 Trawl 3						01/May/22 Trawl 3						30/May/22 Trawl 3
3.867	0.08675					3.891	0.11075					4	0.21975					4.073	0.29275					3.895	0.11475
3.891	0.11075		0.0980833	0.0120554		3.882	0.10175		0.10275	0.00754983		4.003	0.22275		0.224083	0.0051316		4.073	0.29275		0.295083	0.00404145		3.868	0.08775		0.10075	0.0135277
3.877	0.09675			0.0120554		3.876	0.09575			0.00754983		4.01	0.22975			0.0051316		4.08	0.29975			0.00404145		3.88	0.09975
																			4.075
																			4.013			0.0337244
																			4.021

## Sheet: Biomass
Num of samples	Gear/Date	Biomass	Stand deviation	% Stand deviation	Abundance	Average	Sum	Average stand deviation
1	Limetic 1 - February 1, 2022	0.64875	0.00953939	0.00953939	53
2	Limetic 2 - February 1, 2022	0.0510833	0.0117189	0.0117189	16
3	Limetic 3 - February 1, 2022	0.733417	0.00950438	0.00950438	178	0.287083	2.58375	0.00906177
4	Littoral 1 - February 1, 2022	0.507083	0.00814453	0.00814453	17
5	Littoral 2 - February 1, 2022	0.0250833	0.00737111	0.00737111	3
6	Littoral 3 - February 1, 2022	0.102417	0.00378594	0.00378594	40
7	Trawl 1 - January 31, 2022	0.26875	0.0153948	0.0153948	152
8	Trawl 2 - January 31, 2022	0.149083	0.00404145	0.00404145	123
9	Trawl 3 - January 31, 2022	0.0980833	0.0120554	0.0120554	62
10	Limetic 1 - March 2, 2022	0.0104167	0.0113725	0.0113725	17
11	Limetic 2 - March 2, 2022	0.652083	0.0130512	0.0130512	42
12	Limetic 3 - March 2, 2022	1.6275	0.015756	0.015756	131
13	Littoral 1 - March 2, 2022	0.0824167	0.00650641	0.00650641	4
14	Littoral 2 - March 2, 2022	0.204083	0.00723418	0.00723418	32	0.381135	3.04442	0.0105813
15	Trawl 1 - March 1, 2022	0.196083	0.00585947	0.00585947	62
16	Trawl 2 - March 1, 2022	0.17375	0.0173205	0.0173205	183
17	Trawl 3 - March 1, 2022	0.10275	0.00754983	0.00754983	121
18	Limetic 1 - April 2, 2022	1.18475	0.00264575	0.00264575	59
19	Limetic 2 - April 2, 2022	0.475417	0.0064291	0.0064291	74
20	Limetic 3 - April 2, 2022	0.203417	0.00929157	0.00929157	85
21	Littoral 1 - April 2, 2022	0.00808333	0.0064291	0.0064291	2
22	Littoral 2 - April 2, 2022	0.13275	0.0034641	0.0034641	6	0.290306	2.61275	0.00618418
23	Littoral 3 - April 2, 2022	0.0220833	0.0011547	0.0011547	11
24	Trawl 1 - April 1, 2022	0.104417	0.00862168	0.00862168	105
25	Trawl 2 - April 1, 2022	0.25775	0.01249	0.01249	167
26	Trawl 3 - April 1, 2022	0.224083	0.0051316	0.0051316	129
27	Limetic 1 - May 2, 2022	0.877083	0.0142244	0.0142244	55
28	Limetic 2 - May 2, 2022	0.06975	0.0151327	0.0151327	33
29	Limetic 3 - May 2, 2022	0.407083	0.00404145	0.00404145	86
30	Littoral 1 - May 2, 2022	0.759083	0.00650641	0.00650641	6	0.316046	2.84442	0.00839449
31	Littoral 2 - May 2, 2022	0.00208333	0.00550757	0.00550757	2
32	Littoral 3 - May 2, 2022	0.227083	0.00814453	0.00814453	563
33	Trawl 1 - May 1, 2022	0.122417	0.00929157	0.00929157	83
34	Trawl 2 - May 1, 2022	0.08475	0.00866025	0.00866025	106
35	Trawl 3 - May 1, 2022	0.295083	0.00404145	0.00404145	190
36	Limetic 1 - May 31, 2022	2.62942	0.0100167	0.0100167	39
37	Limetic 2 - May 31, 2022	0.06275	0.0191572	0.0191572	22
38	Limetic 3 - May 31, 2022	0.59775	0.0163707	0.0163707	305
39	Littoral 1 - May 31, 2022	3.17408	0.0183394	0.0183394	16	0.585542	4.68433	0.0162368			This sample was removed because an adult fish ate everything and got caught in the net.
40	Littoral 2 - May 31, 2022	0.0470833	0.0178979	0.0178979	3
41	Littoral 3 - May 31, 2022	0.31275	0.0185652	0.0185652	25
42	Trawl 1 - May 30, 2022	0.80375	0.0181934	0.0181934	26
43	Trawl 2 - May 30, 2022	0.130083	0.0161658	0.0161658	122
44	Trawl 3 - May 30, 2022	0.10075	0.0135277	0.0135277	140
		18.9484			3696		15.7697
	Biomass average	0.430646
	Estándar deviation	0.646853
				Biomass Limnetic	0.682044	10.2307
				Biomass Littoral	0.40044	2.43208
				Biomass trawl	0.207439	3.11158

## Sheet: Sperman correlation
Sample	Biomass	Abundance	X	Y	d	d2
1	0.64875	53	9	24	15	225
2	0.0510833	16	37	35	-2	4		g.l (Degrees of freedom)	42			R	SPSS	Excel
3	0.733417	178	7	5	-2	4		n	43		Rho Sperman	0.402145	0.402	0.402258
4	0.507083	17	11	33.5	22.5	506.25		Total	7916.5		P	0.008	0.008
5	0.0250833	3	39	40.5	1.5	2.25
6	0.102417	40	30	26	-4	16
7	0.26875	152	16	7	-9	81
8	0.149083	123	24	11	-13	169
9	0.0980833	62	32	20.5	-11.5	132.25
10	0.0104167	17	41	33.5	-7.5	56.25
11	0.652083	42	8	25	17	289
12	1.6275	131	2	9	7	49
13	0.0824167	4	34	39	5	25
14	0.204083	32	20	29	9	81
15	0.196083	62	22	20.5	-1.5	2.25
16	0.17375	183	23	4	-19	361
17	0.10275	121	29	13	-16	256
18	1.18475	59	3	22	19	361
19	0.475417	74	12	19	7	49
20	0.203417	85	21	17	-4	16
21	0.00808333	2	42	42.5	0.5	0.25
22	0.13275	6	25	37.5	12.5	156.25
23	0.0220833	11	40	36	-4	16
24	0.104417	105	28	15	-13	169
25	0.25775	167	17	6	-11	121
26	0.224083	129	19	10	-9	81
27	0.877083	55	4	23	19	361
28	0.06975	33	35	28	-7	49
29	0.407083	86	13	16	3	9
30	0.759083	6	6	37.5	31.5	992.25
31	0.00208333	2	43	42.5	-0.5	0.25
32	0.227083	563	18	1	-17	289
33	0.122417	83	27	18	-9	81
34	0.08475	106	33	14	-19	361
35	0.295083	190	15	3	-12	144
36	2.62942	39	1	27	26	676
37	0.06275	22	36	32	-4	16
39							This sample was removed because an adult fish ate everything and got caught in the net.
38	0.59775	305	10	2	-8	64
40	0.0470833	3	38	40.5	2.5	6.25
41	0.31275	25	14	31	17	289
42	0.80375	26	5	30	25	625
43	0.130083	122	26	12	-14	196
44	0.10075	140	31	8	-23	529
						7916.5
